# Supplementary material for: Relationship between non-alcoholic fatty liver disease and cardiac arrhythmia: a systematic review and meta-analysis
Source: PubMed Central journal article supplement — J Int Med Res. 2021 Sep 30;49(9):03000605211047074. doi: 10.1177/03000605211047074 (PMC8489776; doi:10.1177/03000605211047074), 2021-09-30
Supplement: sj-pdf-1-imr-10.1177_03000605211047074.pdf [file sj-pdf-1-imr-10.1177_03000605211047074.pdf]

## Appendix A – Full Electronic Search Strategies

### The retrieval strategy for PubMed

((((((((((((Non alcoholic Fatty Liver Disease[Title/Abstract])) OR (NAFLD[Title/Abstract])) OR (Nonalcoholic Fatty Liver Disease[Title/Abstract])) OR (Fatty Liver, Nonalcoholic[Title/Abstract])) OR (Fatty Livers, Nonalcoholic[Title/Abstract])) OR (Liver, Nonalcoholic Fatty[Title/Abstract])) OR (Livers, Nonalcoholic Fatty[Title/Abstract])) OR (Nonalcoholic Fatty Liver[Title/Abstract])) OR (Nonalcoholic Fatty Livers[Title/Abstract])) OR (Nonalcoholic Steatohepatitis[Title/Abstract])) OR (Nonalcoholic Steatohepatitides[Title/Abstract])) OR (Steatohepatitides, Nonalcoholic[Title/Abstract])) OR (Steatohepatitis, Nonalcoholic[Title/Abstract])) OR "Non-alcoholic Fatty Liver Disease"[Mesh] AND (((((((((((((Arrhythmia, Cardiac[Title/Abstract])) OR (Cardiac Dysrhythmia[Title/Abstract])) OR (Dysrhythmia, Cardiac[Title/Abstract])) OR (Cardiac Arrhythmia[Title/Abstract])) OR (Cardiac Arrhythmias[Title/Abstract])) OR (Arrhythmia[Title/Abstract])) OR (Arrhythmia[Title/Abstract])) OR "Arrhythmias, Cardiac"[Mesh] OR (((((((((((((((((((((((Atrial Fibrillations[Title/Abstract])) OR (Fibrillation, Atrial[Title/Abstract])) OR (Fibrillations, Atrial[Title/Abstract])) OR (Auricular Fibrillation[Title/Abstract])) OR (Auricular Fibrillations[Title/Abstract])) OR (Fibrillation, Auricular[Title/Abstract])) OR (Fibrillations, Auricular[Title/Abstract])) OR (Persistent Atrial Fibrillation[Title/Abstract])) OR (Atrial Fibrillation, Persistent[Title/Abstract])) OR (Atrial Fibrillations, Persistent[Title/Abstract])) OR (Fibrillation, Persistent Atrial[Title/Abstract])) OR (Fibrillations, Persistent Atrial[Title/Abstract])) OR (Persistent Atrial Fibrillations[Title/Abstract])) OR (Familial Atrial Fibrillation[Title/Abstract])) OR (Atrial Fibrillation, Familial[Title/Abstract])) OR (Atrial Fibrillations, Familial[Title/Abstract])) OR (Familial Atrial Fibrillations[Title/Abstract])) OR (Fibrillation, Familial Atrial[Title/Abstract])) OR (Fibrillations, Familial Atrial[Title/Abstract])) OR (Paroxysmal Atrial Fibrillation[Title/Abstract])) OR (Atrial Fibrillation, Paroxysmal[Title/Abstract])) OR (Atrial Fibrillations, Paroxysmal[Title/Abstract])) OR (Fibrillation, Paroxysmal Atrial[Title/Abstract])) OR (Fibrillations, Paroxysmal Atrial[Title/Abstract])) OR (Paroxysmal Atrial Fibrillations[Title/Abstract])) OR "Atrial Fibrillation"[Mesh] OR ((Electrocardiogram QT Prolonged[Title/Abstract])) OR "Long QT Syndrome"[Mesh] OR (((((((((((((((((((Block, Heart[Title/Abstract])) OR (Blocks, Heart[Title/Abstract])) OR (Heart Blocks[Title/Abstract])) OR (Auriculo-Ventricular Dissociation[Title/Abstract])) OR (Auriculo Ventricular Dissociation[Title/Abstract])) OR (Dissociation, Auriculo-Ventricular[Title/Abstract])) OR (Dissociations, Auriculo-Ventricular[Title/Abstract])) OR (Atrioventricular Dissociation[Title/Abstract])) OR (Atrioventricular Dissociations[Title/Abstract])) OR (Dissociation, Atrioventricular[Title/Abstract])) OR (Dissociations, Atrioventricular[Title/Abstract])) OR (A-V Dissociation[Title/Abstract])) OR (A V Dissociation[Title/Abstract])) OR (A-V Dissociations[Title/Abstract])) OR (Dissociation, A-V[Title/Abstract])) OR (Dissociations, A-V[Title/Abstract])) OR "Heart Block"[Mesh] OR (((((((((((((((((((Premature Complexes, Atrial[Title/Abstract])) OR (Atrial Premature Complex[Title/Abstract])) OR (Atrial Premature Complices[Title/Abstract])) OR (Premature Complex, Atrial[Title/Abstract])) OR (Premature Complices, Atrial[Title/Abstract])) OR (Premature Supraventricular Beats[Title/Abstract])) OR (Premature Supraventricular Beat[Title/Abstract])) OR (Supraventricular Beat, Premature[Title/Abstract])) OR (Supraventricular Beats, Premature[Title/Abstract])) OR (Premature Atrial Beats[Title/Abstract])) OR (Atrial Beat, Premature[Title/Abstract])) OR (Atrial Beats, Premature[Title/Abstract])) OR (Premature Atrial

Beat[Title/Abstract])) OR (Premature Atrial Complex[Title/Abstract])) OR (Atrial Complex, Premature[Title/Abstract])) OR (Atrial Complices, Premature[Title/Abstract])) OR (Premature Atrial Complices[Title/Abstract])) OR (Premature Atrial Contractions[Title/Abstract])) OR (Atrial Contraction, Premature[Title/Abstract])) OR (Atrial Contractions, Premature[Title/Abstract])) OR (Premature Atrial Contraction[Title/Abstract])) OR (Atrial Ectopic Beats[Title/Abstract])) OR (Atrial Ectopic Beat[Title/Abstract])) OR (Ectopic Beat, Atrial[Title/Abstract])) OR (Ectopic Beats, Atrial[Title/Abstract])) OR (Extrasystole, Atrial[Title/Abstract])) OR (Atrial Extrasystole[Title/Abstract])) OR (Atrial Extrasystoles[Title/Abstract])) OR (Extrasystoles, Atrial[Title/Abstract])) OR "Atrial Premature Complexes"[Mesh]) OR (((((((((((((((Premature Ventricular Beats[Title/Abstract])) OR (Premature Ventricular Beat[Title/Abstract])) OR (Ventricular Beat, Premature[Title/Abstract])) OR (Ventricular Beats, Premature[Title/Abstract])) OR (Ventricular Premature Complex[Title/Abstract])) OR (Premature Ventricular Contractions[Title/Abstract])) OR (Premature Ventricular Contraction[Title/Abstract])) OR (Ventricular Contraction, Premature[Title/Abstract])) OR (Ventricular Contractions, Premature[Title/Abstract])) OR (Ventricular Ectopic Beats[Title/Abstract])) OR (Ectopic Beat, Ventricular[Title/Abstract])) OR (Ectopic Beats, Ventricular[Title/Abstract])) OR (Ventricular Ectopic Beat[Title/Abstract])) OR (Extrasystole, Ventricular[Title/Abstract])) OR (Ventricular Extrasystole[Title/Abstract])) OR (Ventricular Extrasystoles[Title/Abstract])) OR (Premature Ventricular Complex[Title/Abstract])) OR (Ventricular Complex, Premature[Title/Abstract])) OR "Ventricular Premature Complexes"[Mesh])

**The retrieval strategy for Embase**

- | <b>No.</b> | <b>Query</b>                                                                                                                                                                                                                                                                                                                                                                                                                                                                                                                                                                                                                                                                                                                                                                                                                                                                                                                                                                                                                           |
|------------|----------------------------------------------------------------------------------------------------------------------------------------------------------------------------------------------------------------------------------------------------------------------------------------------------------------------------------------------------------------------------------------------------------------------------------------------------------------------------------------------------------------------------------------------------------------------------------------------------------------------------------------------------------------------------------------------------------------------------------------------------------------------------------------------------------------------------------------------------------------------------------------------------------------------------------------------------------------------------------------------------------------------------------------|
| #1.        | 'nonalcoholic fatty liver'/exp                                                                                                                                                                                                                                                                                                                                                                                                                                                                                                                                                                                                                                                                                                                                                                                                                                                                                                                                                                                                         |
| #2.        | 'non alcoholic fatty liver disease':ab,ti OR 'nafld':ab,ti OR 'nonalcoholic fatty liver disease':ab,ti OR 'fatty liver, nonalcoholic':ab,ti OR 'fatty livers, nonalcoholic':ab,ti OR 'liver, nonalcoholic fatty':ab,ti OR 'livers, nonalcoholic fatty':ab,ti OR 'nonalcoholic fatty liver':ab,ti OR 'nonalcoholic fatty livers':ab,ti OR 'nonalcoholic steatohepatitis':ab,ti                                                                                                                                                                                                                                                                                                                                                                                                                                                                                                                                                                                                                                                          |
| #3.        | #1 OR #2                                                                                                                                                                                                                                                                                                                                                                                                                                                                                                                                                                                                                                                                                                                                                                                                                                                                                                                                                                                                                               |
| #4.        | 'heart arrhythmia'/exp                                                                                                                                                                                                                                                                                                                                                                                                                                                                                                                                                                                                                                                                                                                                                                                                                                                                                                                                                                                                                 |
| #5.        | 'arrhythmia, cardiac':ab,ti OR 'cardiac dysrhythmia':ab,ti OR 'dysrhythmia, cardiac':ab,ti OR 'cardiac arrhythmia':ab,ti OR 'cardiac arrhythmias':ab,ti OR 'arrhythmia':ab,ti OR 'arrythmia':ab,ti                                                                                                                                                                                                                                                                                                                                                                                                                                                                                                                                                                                                                                                                                                                                                                                                                                     |
| #6.        | #4 OR #5                                                                                                                                                                                                                                                                                                                                                                                                                                                                                                                                                                                                                                                                                                                                                                                                                                                                                                                                                                                                                               |
| #7.        | 'atrial fibrillation'/exp                                                                                                                                                                                                                                                                                                                                                                                                                                                                                                                                                                                                                                                                                                                                                                                                                                                                                                                                                                                                              |
| #8.        | 'atrial fibrillations':ab,ti OR 'fibrillation, atrial':ab,ti OR 'fibrillations, atrial':ab,ti OR 'auricular fibrillation':ab,ti OR 'auricular fibrillations':ab,ti OR 'fibrillation, auricular':ab,ti OR 'fibrillations, auricular':ab,ti OR 'persistent atrial fibrillation':ab,ti OR 'atrial fibrillation, persistent':ab,ti OR 'atrial fibrillations, persistent':ab,ti OR 'fibrillation, persistent atrial':ab,ti OR 'fibrillations, persistent atrial':ab,ti OR 'persistent atrial fibrillations':ab,ti OR 'familial atrial fibrillation':ab,ti OR 'atrial fibrillation, familial':ab,ti OR 'atrial fibrillations, familial':ab,ti OR 'familial atrial fibrillations':ab,ti OR 'fibrillation, familial atrial':ab,ti OR 'fibrillations, familial atrial':ab,ti OR 'paroxysmal atrial fibrillation':ab,ti OR 'atrial fibrillation, paroxysmal':ab,ti OR 'atrial fibrillations, paroxysmal':ab,ti OR 'fibrillation, paroxysmal atrial':ab,ti OR 'fibrillations, paroxysmal atrial':ab,ti OR 'paroxysmal atrial fibrillations':ab,ti |
| #9.        | #7 OR #8                                                                                                                                                                                                                                                                                                                                                                                                                                                                                                                                                                                                                                                                                                                                                                                                                                                                                                                                                                                                                               |
| #10.       | 'long qt syndrome'/exp                                                                                                                                                                                                                                                                                                                                                                                                                                                                                                                                                                                                                                                                                                                                                                                                                                                                                                                                                                                                                 |

- #11. 'electrocardiogram qt prolonged':ab,ti
- #12. #10 OR #11
- #13. 'heart block'/exp
- #14. 'block, heart':ab,ti OR 'blocks, heart':ab,ti OR 'heart blocks':ab,ti OR 'auriculo-ventricular dissociation':ab,ti OR 'auriculo ventricular dissociation':ab,ti OR 'auriculo-ventricular dissociations':ab,ti OR 'dissociation, auriculo-ventricular':ab,ti OR 'dissociations, auriculo-ventricular':ab,ti OR 'atrioventricular dissociation':ab,ti OR 'atrioventricular dissociations':ab,ti OR 'dissociation, atrioventricular':ab,ti OR 'dissociations, atrioventricular':ab,ti OR 'A-V dissociation':ab,ti OR 'A V dissociation':ab,ti OR 'A-V dissociations':ab,ti OR 'dissociation, A-V':ab,ti OR 'dissociations, A-V':ab,ti
- #15. #13 OR #14
- #16. 'supraventricular premature beat'/exp
- #17. 'premature complexes, atrial':ab,ti OR 'atrial premature complex':ab,ti OR 'atrial premature complices':ab,ti OR 'premature complex, atrial':ab,ti OR 'premature complices, atrial':ab,ti OR 'premature supraventricular beats':ab,ti OR 'premature supraventricular beat':ab,ti OR 'supraventricular beat, premature':ab,ti OR 'supraventricular beats, premature':ab,ti OR 'premature atrial beats':ab,ti OR 'atrial beat, premature':ab,ti OR 'atrial beats, premature':ab,ti OR 'premature atrial beat':ab,ti OR 'premature atrial complex':ab,ti OR 'atrial complex, premature':ab,ti OR 'atrial complices, premature':ab,ti OR 'premature atrial complices':ab,ti OR 'premature atrial contractions':ab,ti OR 'atrial contraction, premature':ab,ti OR 'atrial contractions, premature':ab,ti OR 'premature atrial contraction':ab,ti OR 'atrial ectopic beats':ab,ti OR 'atrial ectopic beat':ab,ti OR 'ectopic beat, atrial':ab,ti OR 'ectopic beats, atrial':ab,ti OR 'extrasystole, atrial':ab,ti OR 'atrial extrasystole':ab,ti OR 'atrial extrasystoles':ab,ti OR 'extrasystoles, atrial':ab,ti
- #18. #16 OR #17
- #19. 'heart ventricle extrasystole'/exp
- #20. 'premature ventricular beats':ab,ti OR 'premature ventricular beat':ab,ti OR 'ventricular beat, premature':ab,ti OR 'ventricular beats, premature':ab,ti OR 'ventricular premature complex':ab,ti OR 'premature ventricular contractions':ab,ti OR 'premature ventricular contraction':ab,ti OR 'ventricular contraction, premature':ab,ti OR 'ventricular contractions, premature':ab,ti OR 'ventricular ectopic beats':ab,ti OR 'ectopic beat, ventricular':ab,ti OR 'ectopic beats, ventricular':ab,ti OR 'ventricular ectopic beat':ab,ti OR 'extrasystole, ventricular':ab,ti OR 'ventricular extrasystole':ab,ti OR 'ventricular extrasystoles':ab,ti OR 'premature ventricular complex':ab,ti OR 'ventricular complex, premature':ab,ti
- #21. #19 OR #20
- #22. #6 OR #9 OR #12 OR #15 OR #18 OR #21
- #23. #3 AND #22

### **The retrieval strategy for the Cochrane Library**

| ID | Search                                                                                                                                                                                                                                                                                                                                                                                                                                                                                                                                             |
|----|----------------------------------------------------------------------------------------------------------------------------------------------------------------------------------------------------------------------------------------------------------------------------------------------------------------------------------------------------------------------------------------------------------------------------------------------------------------------------------------------------------------------------------------------------|
| #1 | MeSH descriptor: [Non-alcoholic Fatty Liver Disease] explode all trees                                                                                                                                                                                                                                                                                                                                                                                                                                                                             |
| #2 | (Non alcoholic Fatty Liver Disease):ti,ab,kw OR (NAFLD):ti,ab,kw OR (Nonalcoholic Fatty Liver Disease):ti,ab,kw OR (Fatty Liver, Nonalcoholic):ti,ab,kw OR (Fatty Livers, Nonalcoholic):ti,ab,kw OR (Liver, Nonalcoholic Fatty):ti,ab,kw OR (Livers, Nonalcoholic Fatty):ti,ab,kw OR (Nonalcoholic Fatty Liver):ti,ab,kw OR (Nonalcoholic Fatty Livers):ti,ab,kw OR (Nonalcoholic Steatohepatitis):ti,ab,kw OR (Nonalcoholic Steatohepatitides):ti,ab,kw OR (Steatohepatitides, Nonalcoholic):ti,ab,kw OR (Steatohepatitis, Nonalcoholic):ti,ab,kw |

#3 #1 OR #2

#4 MeSH descriptor: [Arrhythmias, Cardiac] explode all trees

#5 (Arrhythmia, Cardiac):ti,ab,kw OR (Cardiac Dysrhythmia):ti,ab,kw OR (Dysrhythmia, Cardiac):ti,ab,kw OR (Cardiac Arrhythmia):ti,ab,kw OR (Cardiac Arrhythmias):ti,ab,kw OR (Arrhythmia):ti,ab,kw OR (Arrythmia):ti,ab,kw

#6 #4 OR #5

#7 MeSH descriptor: [Atrial Fibrillation] explode all trees

#8 (Atrial Fibrillations):ti,ab,kw OR (Fibrillation, Atrial):ti,ab,kw OR (Fibrillations, Atrial):ti,ab,kw OR (Auricular Fibrillation):ti,ab,kw OR (Auricular Fibrillations):ti,ab,kw OR (Fibrillation, Auricular):ti,ab,kw OR (Fibrillations, Auricular):ti,ab,kw OR (Persistent Atrial Fibrillation):ti,ab,kw OR (Atrial Fibrillation, Persistent):ti,ab,kw OR (Atrial Fibrillations, Persistent):ti,ab,kw OR (Fibrillation, Persistent Atrial):ti,ab,kw OR (Fibrillations, Persistent Atrial):ti,ab,kw OR (Persistent Atrial Fibrillations):ti,ab,kw OR (Familial Atrial Fibrillation):ti,ab,kw OR (Atrial Fibrillation, Familial):ti,ab,kw OR (Atrial Fibrillations, Familial):ti,ab,kw OR (Familial Atrial Fibrillations):ti,ab,kw OR (Fibrillation, Familial Atrial):ti,ab,kw OR (Fibrillations, Familial Atrial):ti,ab,kw OR (Paroxysmal Atrial Fibrillation):ti,ab,kw OR (Atrial Fibrillation, Paroxysmal):ti,ab,kw OR (Atrial Fibrillations, Paroxysmal):ti,ab,kw OR (Fibrillation, Paroxysmal Atrial):ti,ab,kw OR (Fibrillations, Paroxysmal Atrial):ti,ab,kw OR (Paroxysmal Atrial Fibrillations):ti,ab,kw

#9 #7 OR #8

#10 MeSH descriptor: [Long QT Syndrome] explode all trees

#11 (Electrocardiogram QT Prolonged):ti,ab,kw

#12 #10 OR #11

#13 MeSH descriptor: [Heart Block] explode all trees

#14 (Block, Heart):ti,ab,kw OR (Blocks, Heart):ti,ab,kw OR (Heart Blocks):ti,ab,kw OR (Auriculo-Ventricular Dissociation):ti,ab,kw OR (Auriculo Ventricular Dissociation):ti,ab,kw OR (Auriculo-Ventricular Dissociations):ti,ab,kw OR (Dissociation, Auriculo-Ventricular):ti,ab,kw OR (Dissociations, Auriculo-Ventricular):ti,ab,kw OR (Atrioventricular Dissociation):ti,ab,kw OR (Atrioventricular Dissociations):ti,ab,kw OR (Dissociation, Atrioventricular):ti,ab,kw OR (Dissociations, Atrioventricular):ti,ab,kw OR (A-V Dissociation):ti,ab,kw OR (A V Dissociation):ti,ab,kw OR (A-V Dissociations):ti,ab,kw OR (Dissociation, A-V):ti,ab,kw OR (Dissociations, A-V):ti,ab,kw

#15 #13 OR #14

#16 MeSH descriptor: [Atrial Premature Complexes] explode all trees

#17 (Premature Complexes, Atrial):ti,ab,kw OR (Atrial Premature Complex):ti,ab,kw OR (Atrial Premature Complices):ti,ab,kw OR (Premature Complex, Atrial):ti,ab,kw OR (Premature Complices, Atrial):ti,ab,kw OR (Premature Supraventricular Beats):ti,ab,kw OR (Premature Supraventricular Beat):ti,ab,kw OR (Supraventricular Beat, Premature):ti,ab,kw OR (Supraventricular Beats, Premature):ti,ab,kw OR (Premature Atrial Beats):ti,ab,kw OR (Atrial Beat, Premature):ti,ab,kw OR (Atrial Beats, Premature):ti,ab,kw OR (Premature Atrial Beat):ti,ab,kw OR (Premature Atrial Complex):ti,ab,kw OR (Atrial Complex, Premature):ti,ab,kw OR (Atrial Complices, Premature):ti,ab,kw OR (Premature Atrial Complices):ti,ab,kw OR (Premature Atrial Contractions):ti,ab,kw OR (Atrial Contraction, Premature):ti,ab,kw OR (Atrial Contractions, Premature):ti,ab,kw OR (Premature Atrial Contraction):ti,ab,kw OR (Atrial Ectopic Beats):ti,ab,kw OR

(Atrial Ectopic Beat):ti,ab,kw OR (Ectopic Beat, Atrial):ti,ab,kw OR (Ectopic Beats, Atrial):ti,ab,kw OR (Extrasystole, Atrial):ti,ab,kw OR (Atrial Extrasystole):ti,ab,kw OR (Atrial Extrasystoles):ti,ab,kw OR (Extrasystoles, Atrial):ti,ab,kw

#18 #16 OR #17

#19 MeSH descriptor: [Ventricular Premature Complexes] explode all trees

#20 (Premature Ventricular Beats):ti,ab,kw OR (Premature Ventricular Beat):ti,ab,kw OR (Ventricular Beat, Premature):ti,ab,kw OR (Ventricular Beats, Premature):ti,ab,kw OR (Ventricular Premature Complex):ti,ab,kw OR (Premature Ventricular Contractions):ti,ab,kw OR (Premature Ventricular Contraction):ti,ab,kw OR (Ventricular Contraction, Premature):ti,ab,kw OR (Ventricular Contractions, Premature):ti,ab,kw OR (Ventricular Ectopic Beats):ti,ab,kw OR (Ectopic Beat, Ventricular):ti,ab,kw OR (Ectopic Beats, Ventricular):ti,ab,kw OR (Ventricular Ectopic Beat):ti,ab,kw OR (Extrasystole, Ventricular):ti,ab,kw OR (Ventricular Extrasystole):ti,ab,kw OR (Ventricular Extrasystoles):ti,ab,kw OR (Premature Ventricular Complex):ti,ab,kw OR (Ventricular Complex, Premature):ti,ab,kw

#21 #19 OR #20

#22 #6 OR #9 OR #12 OR #15 OR #18 OR #21

#23 #3 and #22

#### **The retrieval strategy for Web of Science**

| <b>No.</b> | <b>Query</b>                                                                                                                                                                                                                                                                                                                                                                                                                                  |
|------------|-----------------------------------------------------------------------------------------------------------------------------------------------------------------------------------------------------------------------------------------------------------------------------------------------------------------------------------------------------------------------------------------------------------------------------------------------|
| #1         | TS=(Non-alcoholic Fatty Liver Disease or Non alcoholic Fatty Liver Disease or NAFLD or Nonalcoholic Fatty Liver Disease or Fatty Liver, Nonalcoholic or Fatty Livers, Nonalcoholic or Liver, Nonalcoholic Fatty or Livers, Nonalcoholic Fatty or Nonalcoholic Fatty Liver or Nonalcoholic Fatty Livers or Nonalcoholic Steatohepatitis or Nonalcoholic Steatohepatitides or Steatohepatitides, Nonalcoholic or Steatohepatitis, Nonalcoholic) |
| #2         | TS=(Arrhythmias, Cardiac or Arrhythmia, Cardiac or Cardiac Dysrhythmia or Dysrhythmia, Cardiac or Cardiac Arrhythmia or Cardiac Arrhythmias or Arrhythmia or Arrhythmia)                                                                                                                                                                                                                                                                      |
| #3         | TS=(Atrial Fibrillation or Atrial Fibrillations or Fibrillation, Atrial or Fibrillations, Atrial or Auricular Fibrillation or Auricular Fibrillations or Fibrillation, Auricular or Fibrillations, Auricular or Persistent Atrial Fibrillation or Atrial Fibrillation, Persistent or Atrial Fibrillations, Persistent or Fibrillation, Persistent Atrial or Fibrillations, Persistent Atrial)                                                 |
| #4         | TS=(long QT syndrome or Electrocardiogram QT Prolonged)                                                                                                                                                                                                                                                                                                                                                                                       |
| #5         | TS=(heart block or Block, Heart or Blocks, Heart or Heart Blocks or Auriculo-Ventricular Dissociation or Auriculo Ventricular Dissociation or Auriculo-Ventricular Dissociations or Dissociation, Auriculo-Ventricular or Dissociations, Auriculo-Ventricular or Atrioventricular Dissociation or Atrioventricular Dissociations or Dissociation, Atrioventricular or Dissociations, Atrioventricular)                                        |
| #6         | TS=(atrial premature complexes or Premature Complexes, Atrial or Atrial Premature Complex or Atrial Premature Complices or Premature Complex, Atrial or Premature Complices, Atrial or Premature Supraventricular Beats or Premature Supraventricular Beat or Supraventricular Beat, Premature or Supraventricular Beats, Premature or Premature Atrial Beats or Atrial Beat, Premature or Atrial Beats, Premature)                           |
| #7         | TS=(ventricular premature complexes or Premature Ventricular Beats or Premature Ventricular Beat or Ventricular Beat, Premature or Ventricular Beats, Premature or Ventricular Premature Complex or Premature Ventricular Contractions or Premature Ventricular                                                                                                                                                                               |

Contraction or Ventricular Contraction, Premature or Ventricular Contractions, Premature  
or Ventricular Ectopic Beats or Ectopic Beat, Ventricular or Ectopic Beats, Ventricular)

#8

#7 OR #6 OR #5 OR #4 OR #3 OR #2

#9

#8 AND #1
